# Supplementary material for: P2Y12 inhibitors monotherapy after short course of dual antiplatelet therapy in patients undergoing percutaneous coronary intervention: a meta-analysis of randomized clinical trials including 29 089 patients
Source: Oxford University Press journal article supplement (doi:10.1093/ehjcvp/pvaa038), 2020-04-21

**APPENDIX, supplementary materials.**

**Table A. Risk of bias according to Jadad Scale.**

| **Study** | **Randomization** | **Blinding** | **Withdrawals and dropout** | **Total score** |
| --- | --- | --- | --- | --- |
| **STOPDAPT-2,**  **JAMA 2019** | 2 | 0 | 1 | 3 |
| **SMART-CHOICE,**  **JAMA 2019** | 2 | 0 | 1 | 3 |
| **GLOBAL LEADERS,**  **LANCET 2018** | 2 | 0 | 1 | 3 |
| **TWILIGHT, NEJM 2019** | 2 | 2 | 1 | 5 |

**Figure A. Rates of myocardial infarction during one year follow-up.**


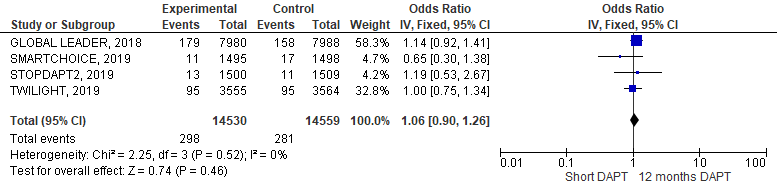


**Figure B. Rates of stroke during one year follow-up.**


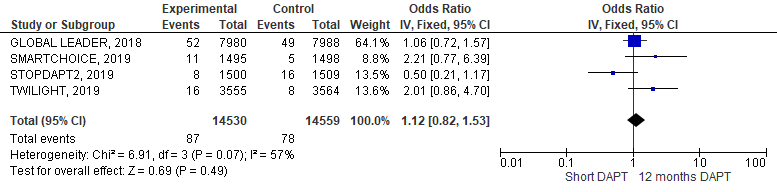


**Figure C. Risk of bias.**


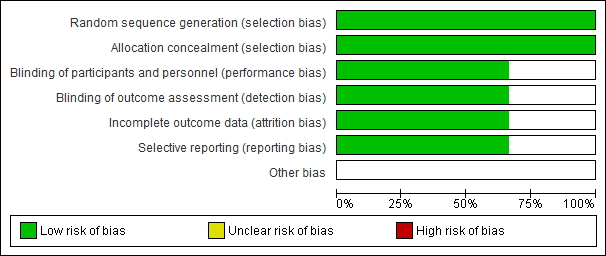


**Figures D: Funnel plots.**

**Figure D1. Funnel plots for MACCE.**

**
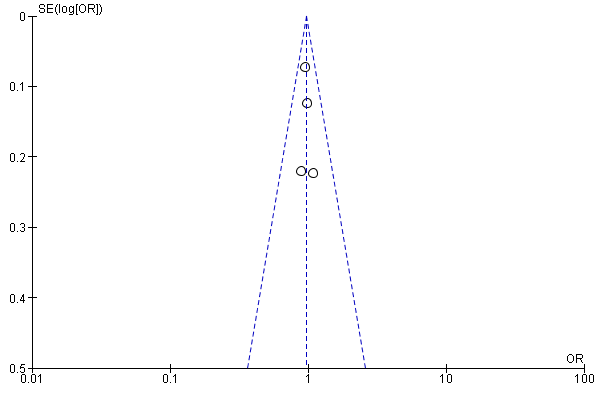
**

**Figure D2. Funnel plots for all cause of death.**

**
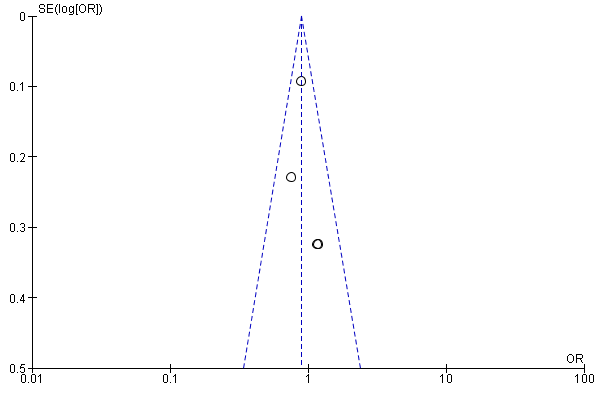
**

**Figure D3. Funnel plots for definite or probable stent thrombosis.**

**
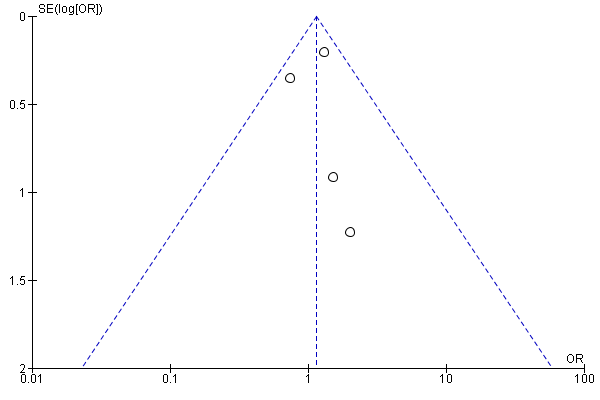
**

**Figure D4. Funnel plots for BARC 3-5.**

**
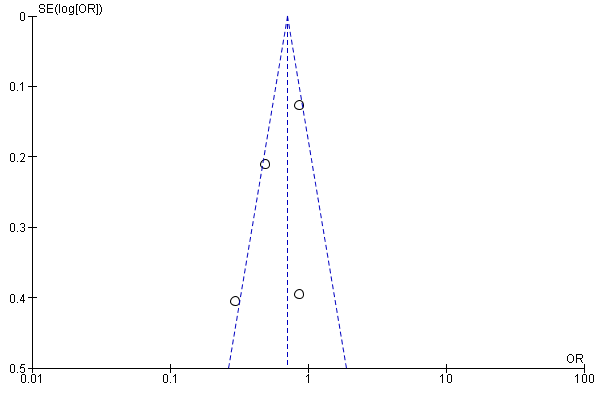
**

**Figure D5. Funnel plots for myocardial infarction.**

**
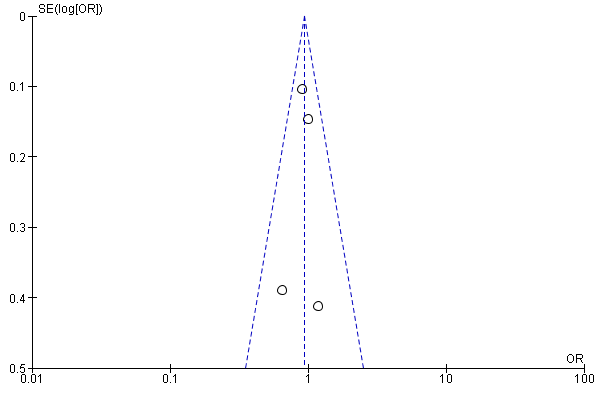
**

**Figure D6. Funnel plots for stroke.**

**
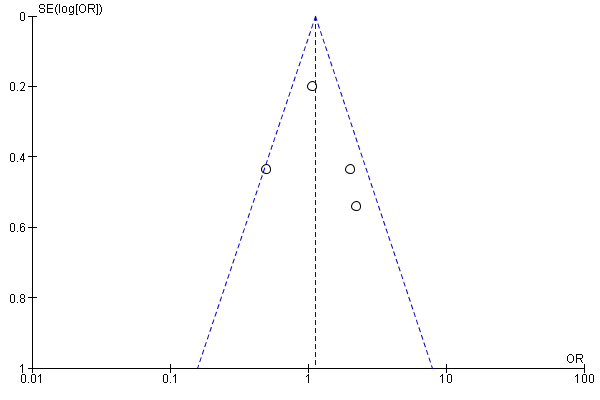
**

**Figures E: Random-effect model analysis.**

**Figure E1. Random-effect model analysis. Rates of MACCE (major adverse cardiac and cerebrovascular events) a composite of all-cause mortality, myocardial infarction, or stroke during one year follow-up.**

**
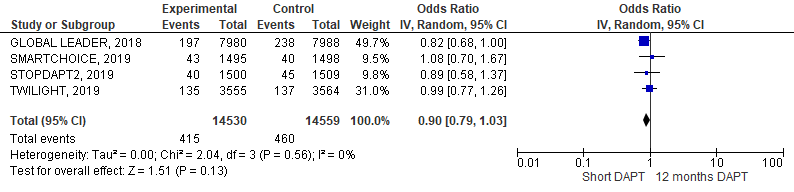
**

**Figure E2. Random-effect model analysis. Rates of all cause of death during one year follow-up.**


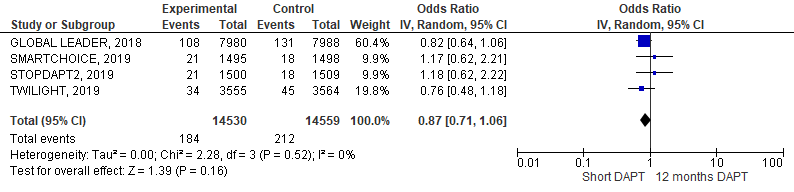


**Figure E3. Random-effect model analysis. Rates of definite or probable stent thrombosis during one year follow-up**.


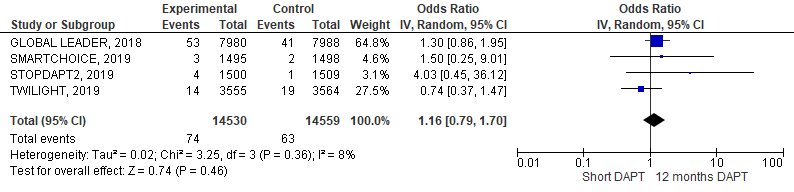


**Figure E4. Random-effect model analysis. Rates of BARC 3-5 bleeding during one year follow-up.**


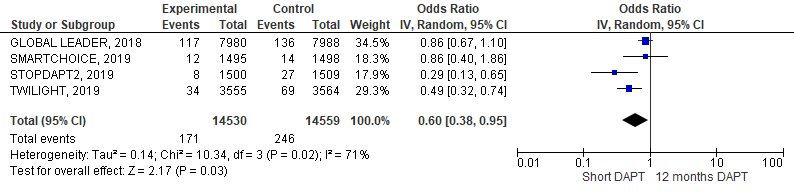


**Figure E5. Random-effect model analysis. Rates of myocardial infarction during one year follow-up.**


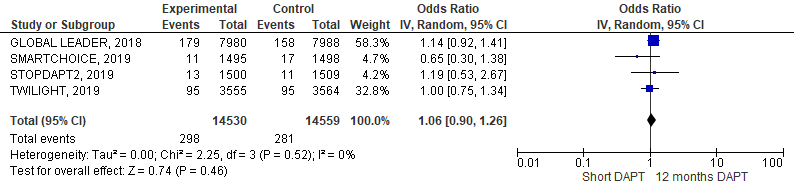


**Figure E6. Random-effect model analysis. Rates of stroke during one year follow-up.**


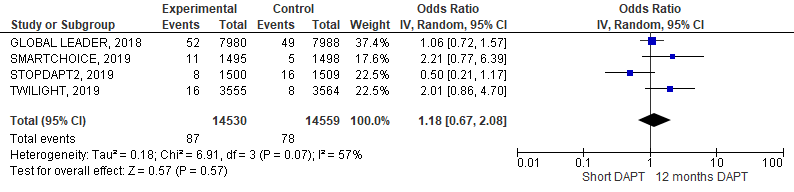

Supplement: pvaa038_supplementary_data.docx [file pvaa038_supplementary_data.docx]
